# Supplementary material for: Development of a Hg-free UV light source and its performance in photolytic and photocatalytic applications
Source: Royal Society of Chemistry journal article supplement (doi:10.1039/c8pp00395e), 2018-11-19
Supplement: c8pp00395e1.pdf [file c8pp00395e1.pdf]

## Development of a Hg-free UV light source and its performance in photolytic and photocatalytic applications

Satoshi Horikoshi,<sup>a,b,\*</sup> Daisuke Yamamoto,<sup>a</sup> Kenta Hagiwara,<sup>a</sup> Akihiro Tsuchida,<sup>a</sup> Isamu Matsumoto,<sup>c</sup> Yoshinari Nishiura,<sup>c</sup> Yousuke Kiyoshima,<sup>c</sup> and Nick Serpone<sup>d</sup>

**Table S1.** EDX measurements of the Pyrex glass small rod for evaluating the possible deterioration of the inner walls caused by lighting the N<sub>2</sub>/SF<sub>6</sub>-filler electrode lamp.

| Elements  | Percent quantities of the elements |                   |
|-----------|------------------------------------|-------------------|
|           | Before irradiation                 | After irradiation |
| O         | 38.5                               | 38.5              |
| Si        | 36.9                               | 37.6              |
| <i>Na</i> | <i>10.2</i>                        | <i>8.6</i>        |
| Ca        | 4.4                                | 4.7               |
| K         | 2.8                                | 2.9               |
| Ba        | 2.8                                | 2.9               |
| Mg        | 2.3                                | 2.4               |
| Al        | 1.8                                | 1.8               |
| S         | 0.097                              | 0.18              |
| Sr        | 0.053                              | 0.060             |
| Fe        | 0.044                              | 0.047             |
| Cu        | 0.013                              | 0.012             |
| Zr        | 0.012                              | 0.013             |
